# Supplementary material
Source: MDPI journal article supplement (https://www.mdpi.com/2073-4395/13/4/1088)

# Figure S1

Example MS/MS (MRM type)  
chromatograms from algae and  
wheat samples, QC samples,  
calibration points

## Target list of componensts:

| #  | Name                                | Quant MS/MS<br>transition m/z | Ionisation&polarity | RT (min) |
|----|-------------------------------------|-------------------------------|---------------------|----------|
| 1  | t-Cinnamic ac                       | 149 > 103                     | UniSpray positive   | 7.53     |
| 2  | indole-3-acetic ac                  | 176.1 > 130.1                 | UniSpray positive   | 5.98     |
| 3  | Benzoic ac                          | 121 > 77                      | UniSpray negative   | 5.44     |
| 4  | Salicylic ac                        | 137 > 93                      | UniSpray negative   | 5.8      |
| 5  | p-Hydroxybenzoic ac                 | 137 > 93.01                   | UniSpray negative   | 2.85     |
| 6  | Acetylsalicylic ac                  | 137 > 93.02                   | UniSpray negative   | 5.32     |
| 7  | p-coumaric ac                       | 163 > 93                      | UniSpray negative   | 4.05     |
| 8  | o-coumaric ac                       | 163 > 93                      | UniSpray negative   | 5.68     |
| 9  | Jasmonic ac                         | 209.12 > 58.9                 | UniSpray negative   | 8.28     |
| 10 | Abscissic ac                        | 263.1 > 153                   | UniSpray negative   | 7.16     |
| 11 | ABA_dH6_ISTD                        | 269.1 > 159.1                 | UniSpray negative   | 7.13     |
| 12 | Naringenin                          | 271 > 150.9                   | UniSpray negative   | 8.17     |
| 13 | Phaseic ac                          | 279.12 > 139                  | UniSpray negative   | 5.19     |
| 14 | Dihydrophaseic ac                   | 281.14 > 171.1                | UniSpray negative   | 3.52     |
| 15 | Kaempferol                          | 285 > 92.9                    | UniSpray negative   | 8.44     |
| 16 | DihydroKaempferol                   | 287 > 259                     | UniSpray negative   | 6.07     |
| 17 | Quercetin                           | 301 > 150.95                  | UniSpray negative   | 7.38     |
| 18 | Taxifolin                           | 303 > 285                     | UniSpray negative   | 4.72     |
| 19 | Myricetin                           | 317 > 150.9                   | UniSpray negative   | 6.08     |
| 20 | Jasmonic ac-Ile/Le                  | 322.2 > 130.1                 | UniSpray negative   | 9.94     |
| 21 | GA20                                | 331.15 > 287.3                | UniSpray negative   | 7.43     |
| 22 | GA4                                 | 331.15 > 269.2                | UniSpray negative   | 9.43     |
| 23 | GibberellicAc_GA3                   | 345 > 239.1                   | UniSpray negative   | 4.46     |
| 24 | GA1                                 | 347.15 > 259.2                | UniSpray negative   | 4.58     |
| 25 | Chlorogenic ac+cryptochlorogenic ac | 353 > 191                     | UniSpray negative   | 2.88     |
| 26 | GA8                                 | 363.14 > 275.1                | UniSpray negative   | 3.02     |
| 27 | Rutin                               | 609.1 > 300.1                 | UniSpray negative   | 4.23     |
| 28 | Neochlorogenic ac                   | 353 > 191                     | UniSpray negative   | 2.21     |

Pages 3-5: Sample chromatograms for compounds above limit of quantitation (LoQ) of wheat leaves extended with external solvent calibration points of abscisic acid (page 5.)

Example MRM type chromatograms for components found above LoQ in a wheat sample  
data file:20210212JandaT\_73 , wheat leaf matrix 100mg/ml) – Slide 1 of 3

ABAd6 – isotope labelled  
internal standard                      indole-3-acetic acid                      salicylic acid                      para-hydroxybenzoic acid                      para-coumaric acid

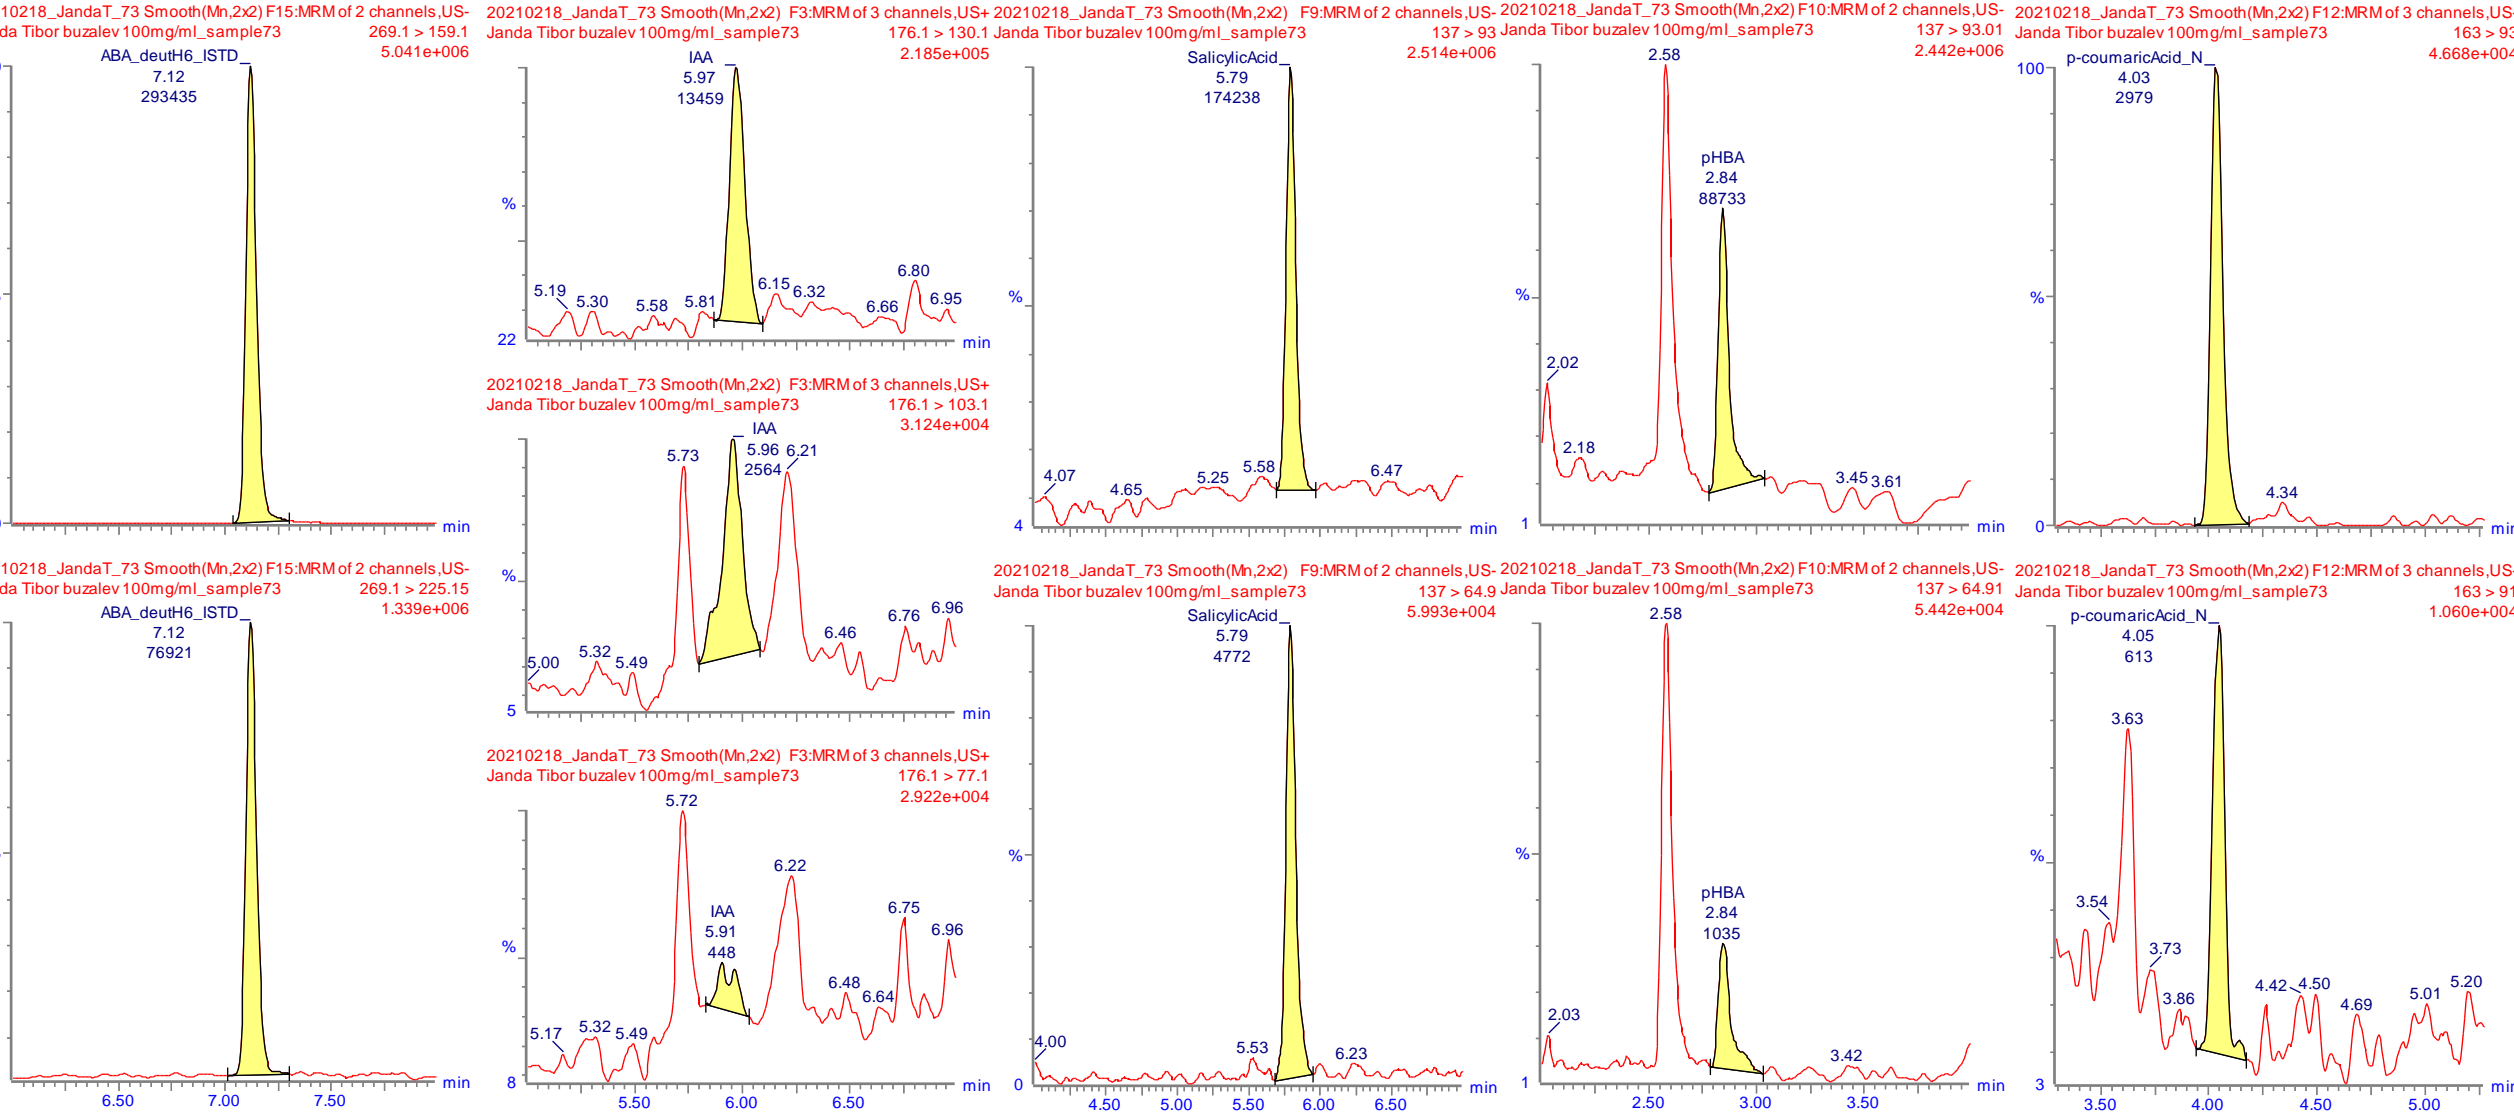

Example MRM type chromatograms for components found above LoQ in a wheat sample  
data file:20210212JandaT\_73 , wheat leaf matrix 100mg/ml) – Slide 2 of 3

jasmonic acid

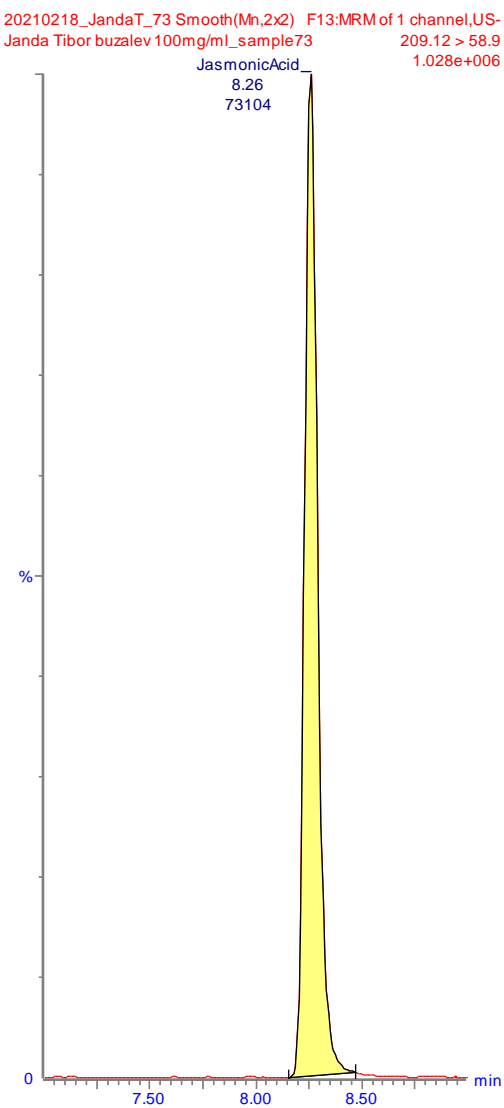

chlorogenic and  
cryptochlorogenic acid

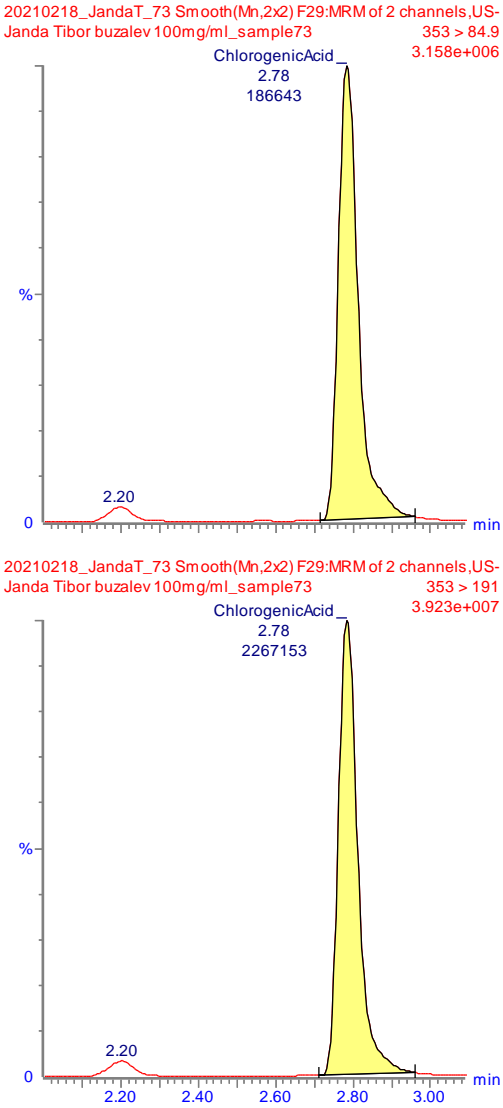

neochlorogenic acid

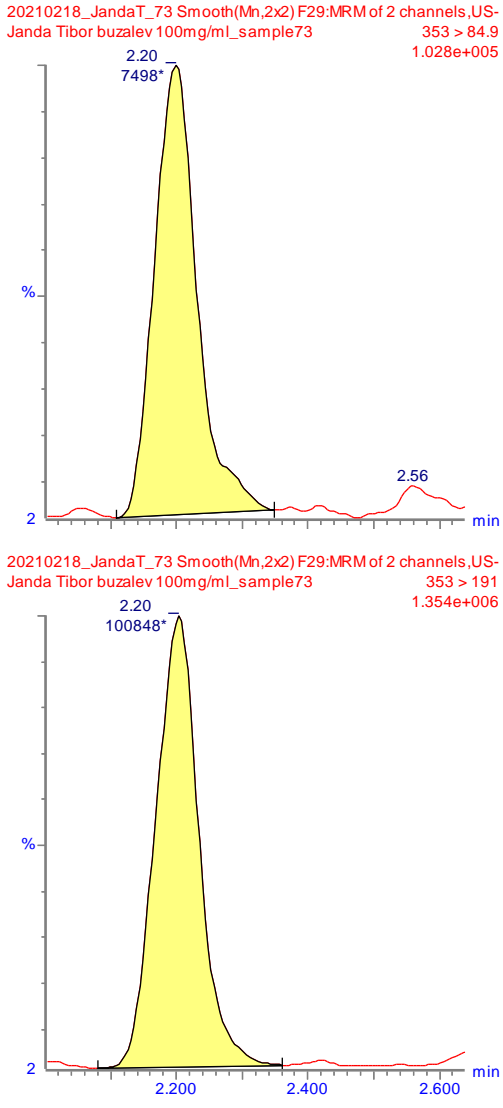

rutin

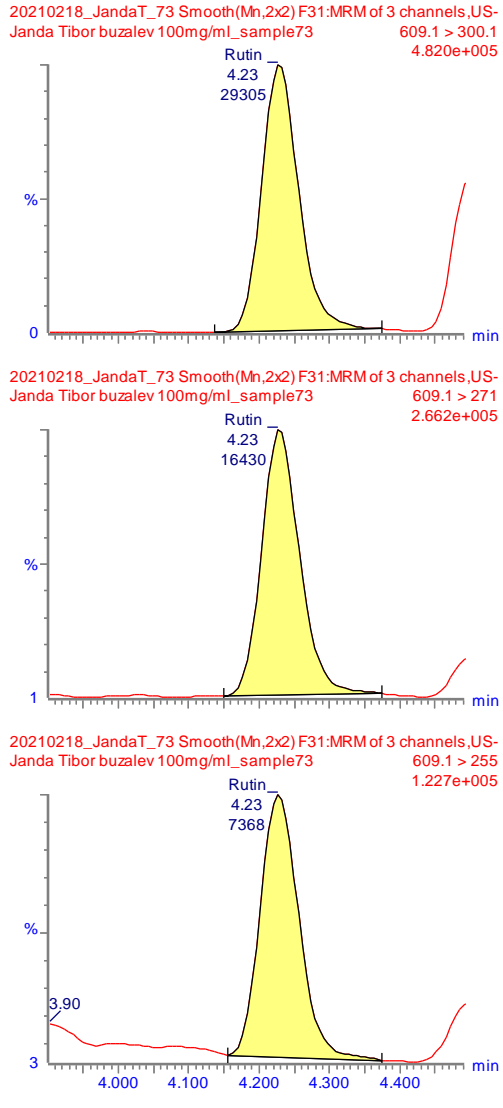

Example MRM type chromatograms for components found above LoQ  
data file:20210212JandaT\_73 , wheat leaf matrix 100mg/ml) – Slide 3 of 3

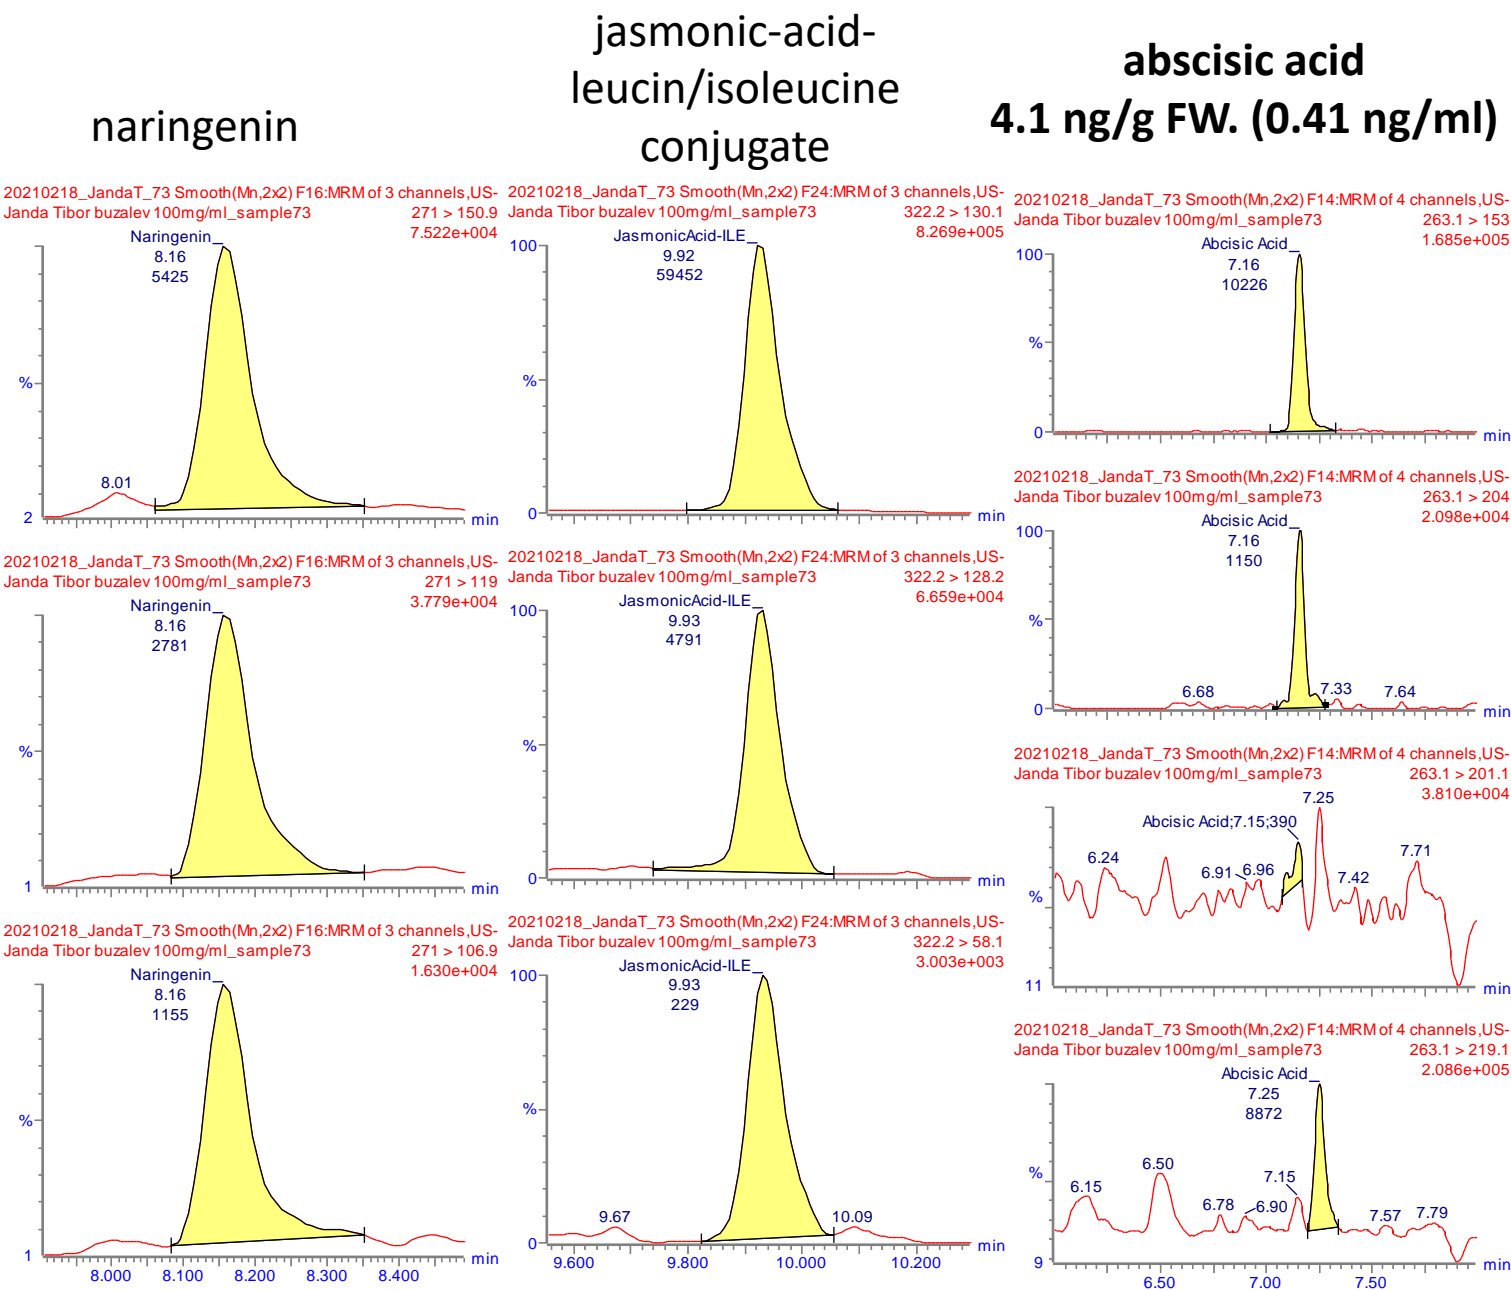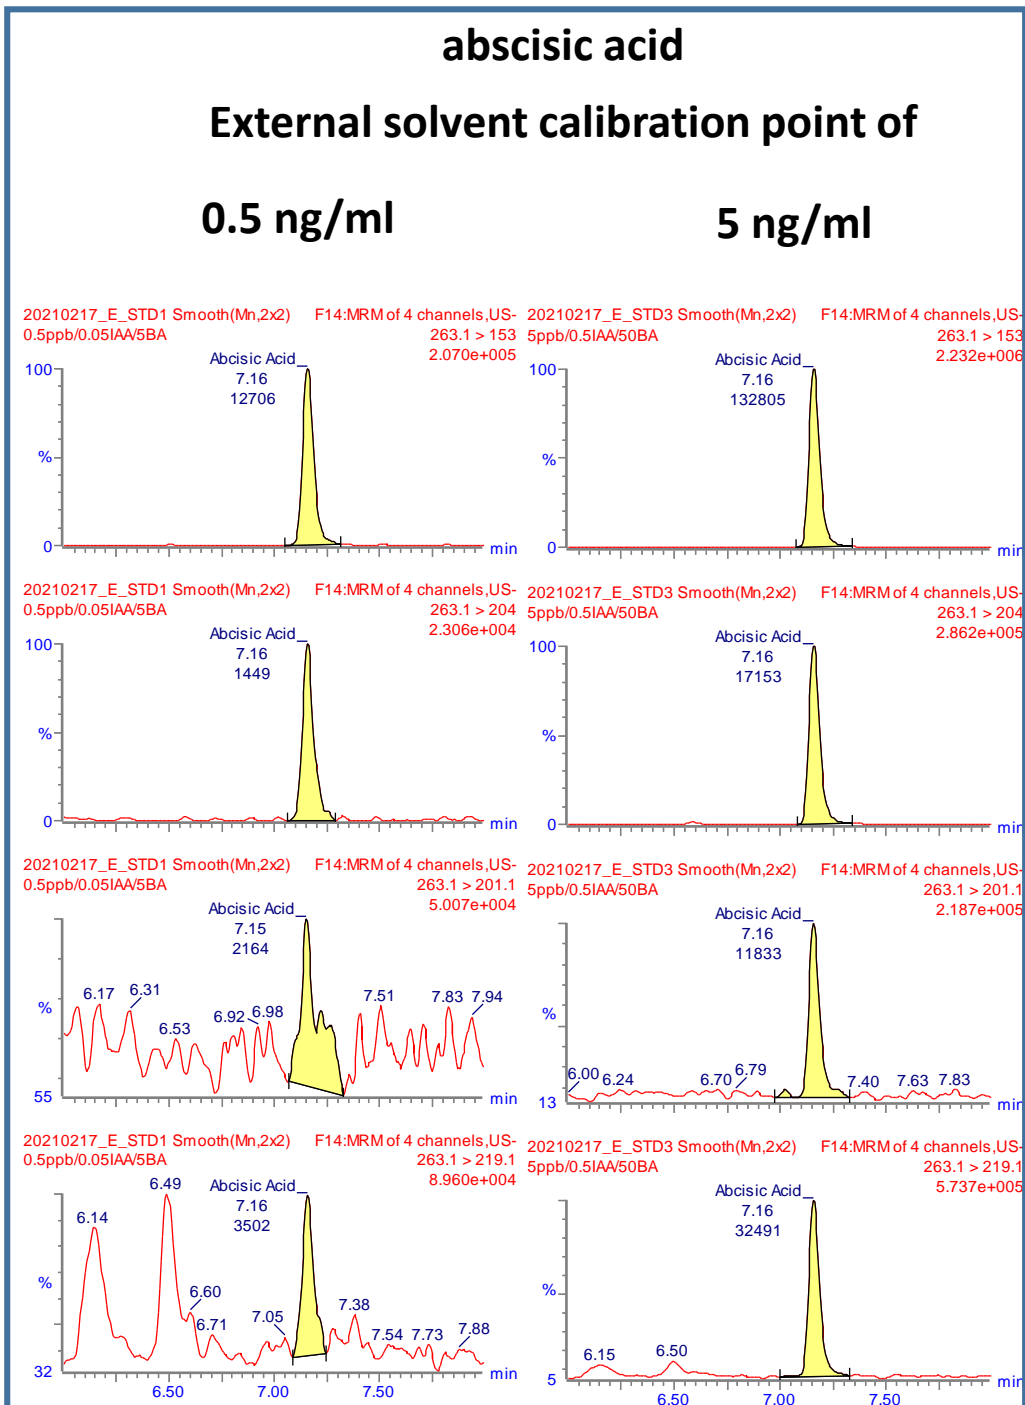

External solvent calibration points of abscisic acid (A) and the external calibration curve for this compound (B)

Compound name: Abcissic Acid  
Correlation coefficient:  $r = 0.999976$ ,  $r^2 = 0.999952$   
Calibration curve:  $26035.4 \cdot x + -376.299$   
Response type: External Std, Area  
Curve type: Linear, Origin: Exclude, Weighting: 1/x, Axis trans: None

**Example of external  
solvent calibration,  
compound abscissic  
acid, measured in US  
negative mode,  
quant transition  
263>153**

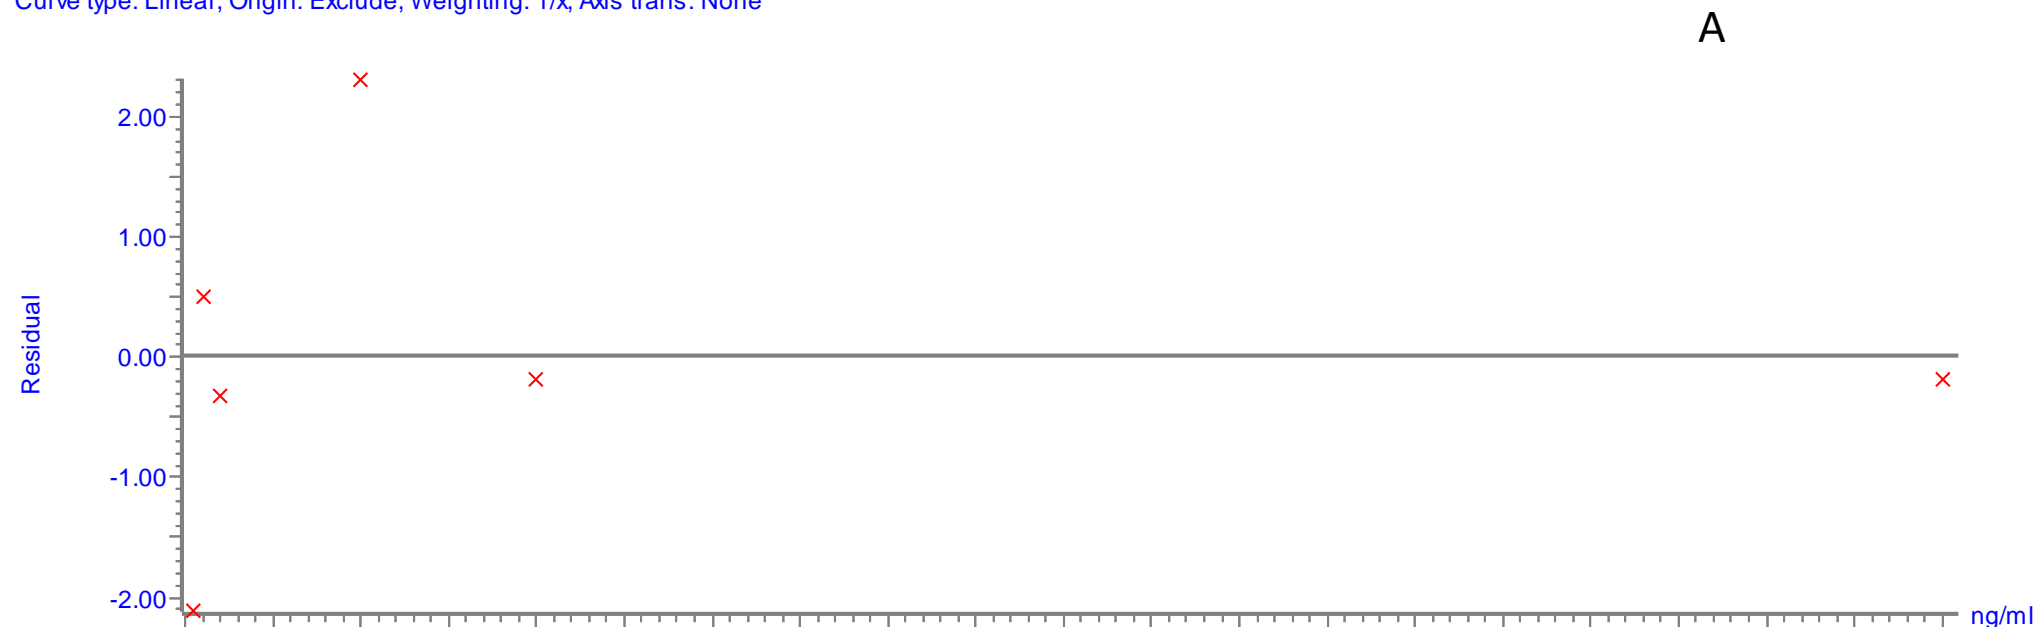

7 levels: 0.1 (or 0.25),  
0.5, 1.0, 5.0, 10, 50,  
100 ng/ml

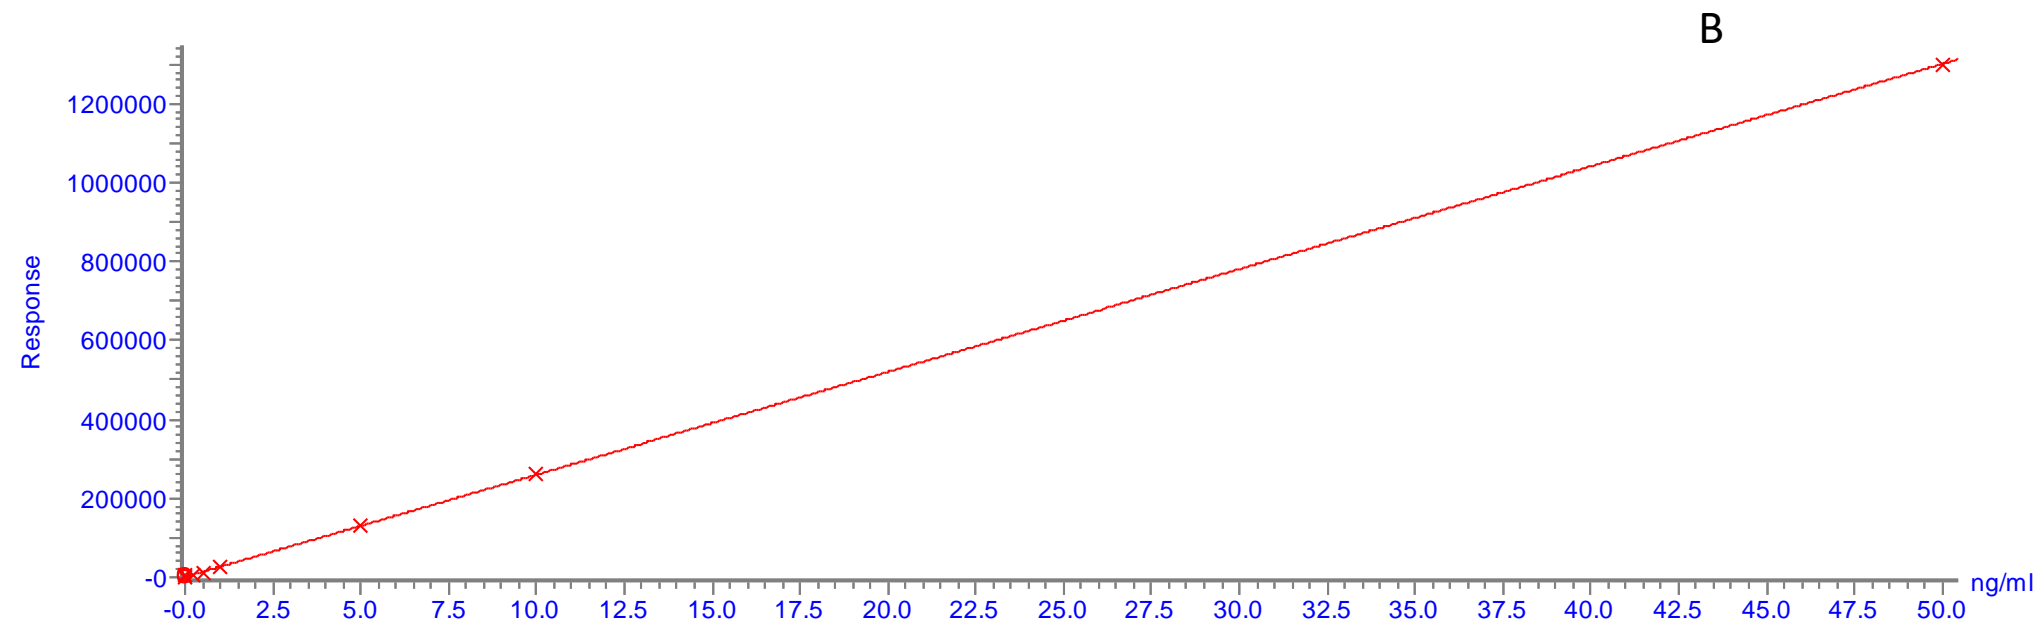

Sample chromatograms of various compounds from four algae samples (922, 438, 430 and 612). <LoQ: below the limit of quantitation



# *trans*-Cinnamic acid

Four sample chromatograms, a spiked sample chromatogram and an external solvent calibration points of *trans*-cinnamic acid.

Procedural Solvent  
calibration point

prepared as samples at  
25ng/ml final conc.

SAMPLES (20mg/ml):

trans-cinnamic acid MRM type MS/MS chromatograms,  
quantitative transition: US + 131>103

ALGAE 922/1

ALGAE 438/1

ALGAE 430/1

ALGAE 612/1

ALGAE 430/4S  
spiked prior to extraction  
at 25ng/ml

20mg/ml alga 922/2 F1:MRM of 3 channels,US+  
131 > 103  
8.485e+004

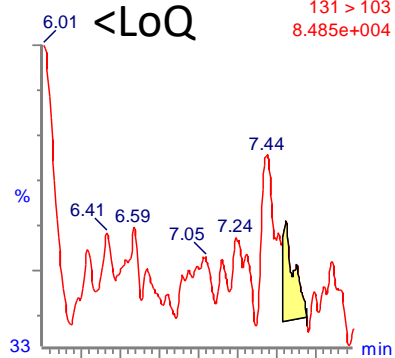

20mg/ml alga 438/1 F1:MRM of 3 channels,US+  
131 > 103  
5.046e+004

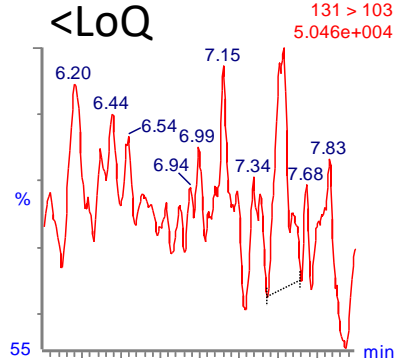

20mg/ml alga 430/1 F1:MRM of 3 channels,US+  
131 > 103  
4.167e+004

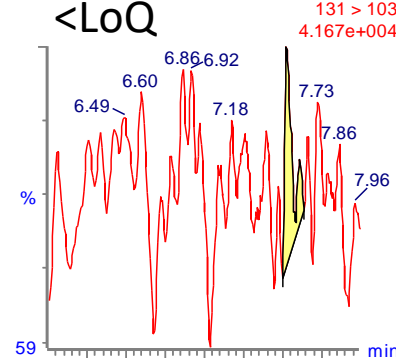

20mg/ml alga 612/1 F1:MRM of 3 channels,US+  
131 > 103  
1.510e+005

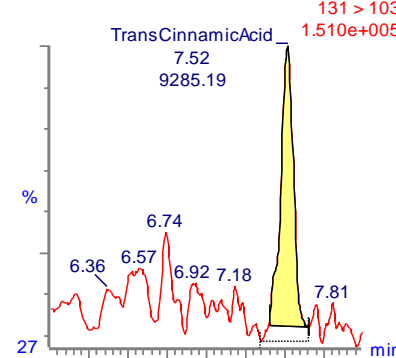

F1:MRM of 3 channels,US+  
131 > 103  
3.523e+006

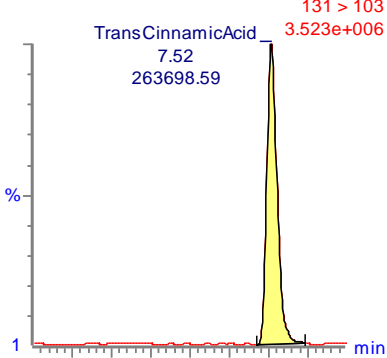

F1:MRM of 3 channels,US+  
131 > 103  
2.940e+006

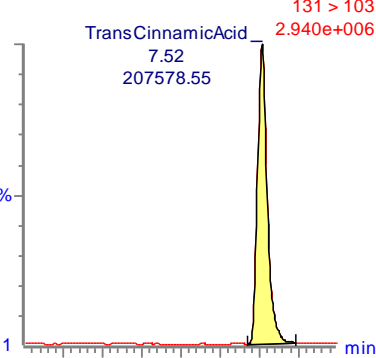

20mg/ml alga 922/2 F1:MRM of 3 channels,US+  
131 > 76.9  
4.283e+004

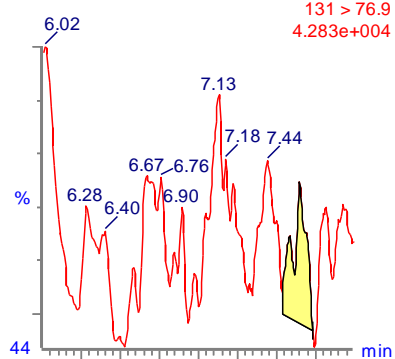

20mg/ml alga 438/1 F1:MRM of 3 channels,US+  
131 > 76.9  
2.944e+004

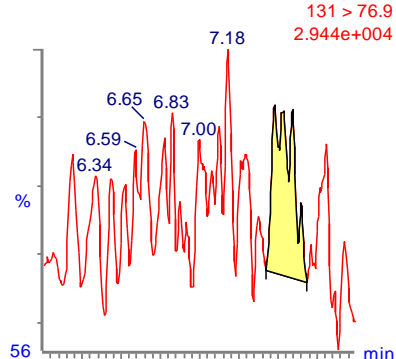

20mg/ml alga 430/1 F1:MRM of 3 channels,US+  
131 > 76.9  
2.229e+004

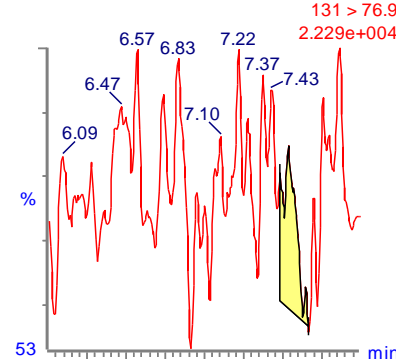

20mg/ml alga 612/1 F1:MRM of 3 channels,US+  
131 > 76.9  
7.054e+004

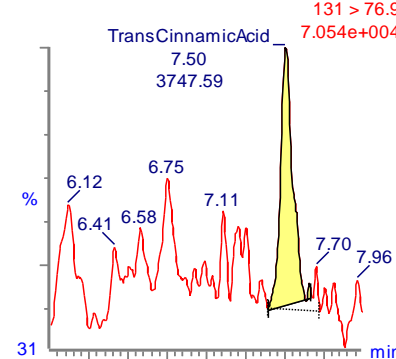

F1:MRM of 3 channels,US+  
131 > 76.9  
1.334e+006

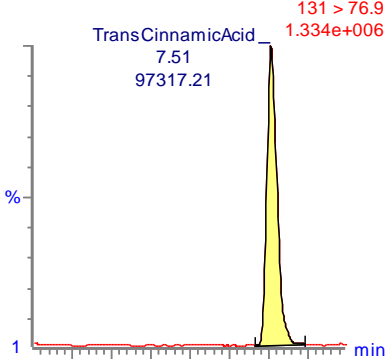

F1:MRM of 3 channels,US+  
131 > 76.9  
1.150e+006

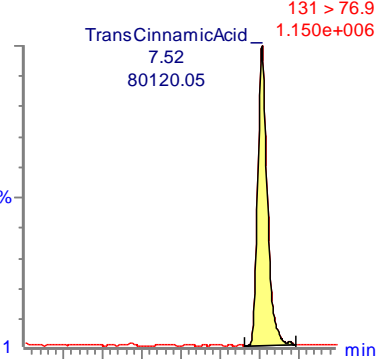

20mg/ml alga 922/2 F1:MRM of 3 channels,US+  
149 > 103  
5.548e+004

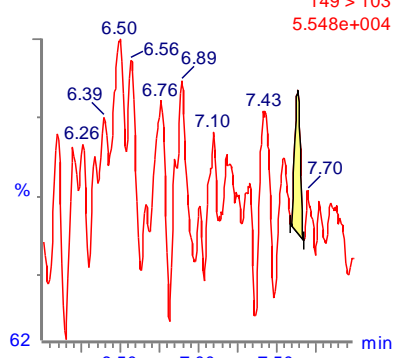

20mg/ml alga 438/1 F1:MRM of 3 channels,US+  
149 > 103  
5.449e+004

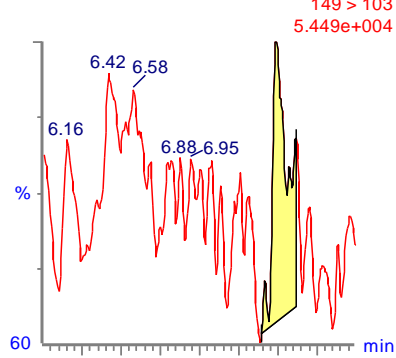

20mg/ml alga 430/1 F1:MRM of 3 channels,US+  
149 > 103  
4.729e+004

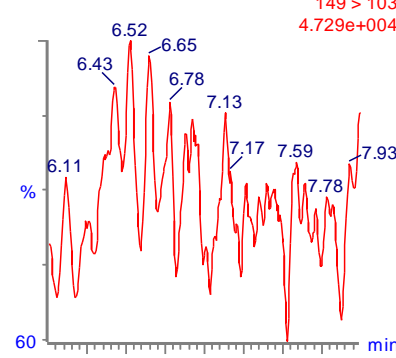

20mg/ml alga 612/1 F1:MRM of 3 channels,US+  
149 > 103  
8.142e+004

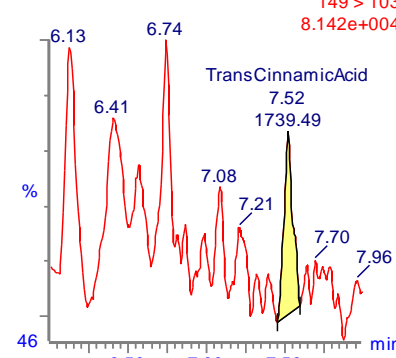

F1:MRM of 3 channels,US+  
149 > 103  
7.832e+005

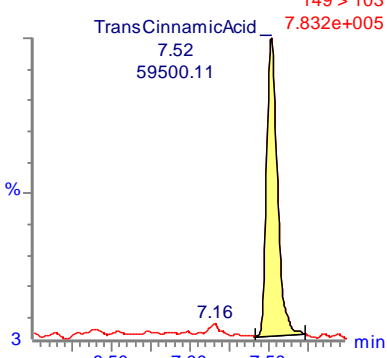

F1:MRM of 3 channels,US+  
149 > 103  
6.369e+005

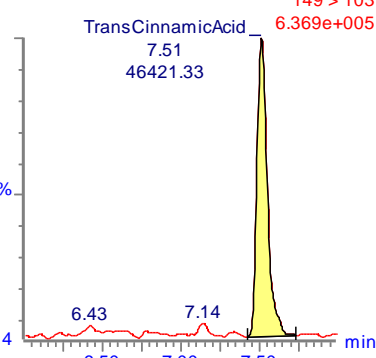

# Indole-3-acetic acid (IAA)

Page 12: Four sample chromatograms of IAA

Page 13: Two sample chromatograms above and below LoQ, a spiked chromatogram of <LOQ sample and an external solvent calibration points of IAA.

Indole-3-acetic acid (IAA) MRM type MS/MS  
chromatograms, slide 1 of 2  
quantitative transition: US + 176.1>130.1

SAMPLES (20mg/ml):

ALGAE 922/1

ALGAE 438/1

ALGAE 430/1

ALGAE 612/1

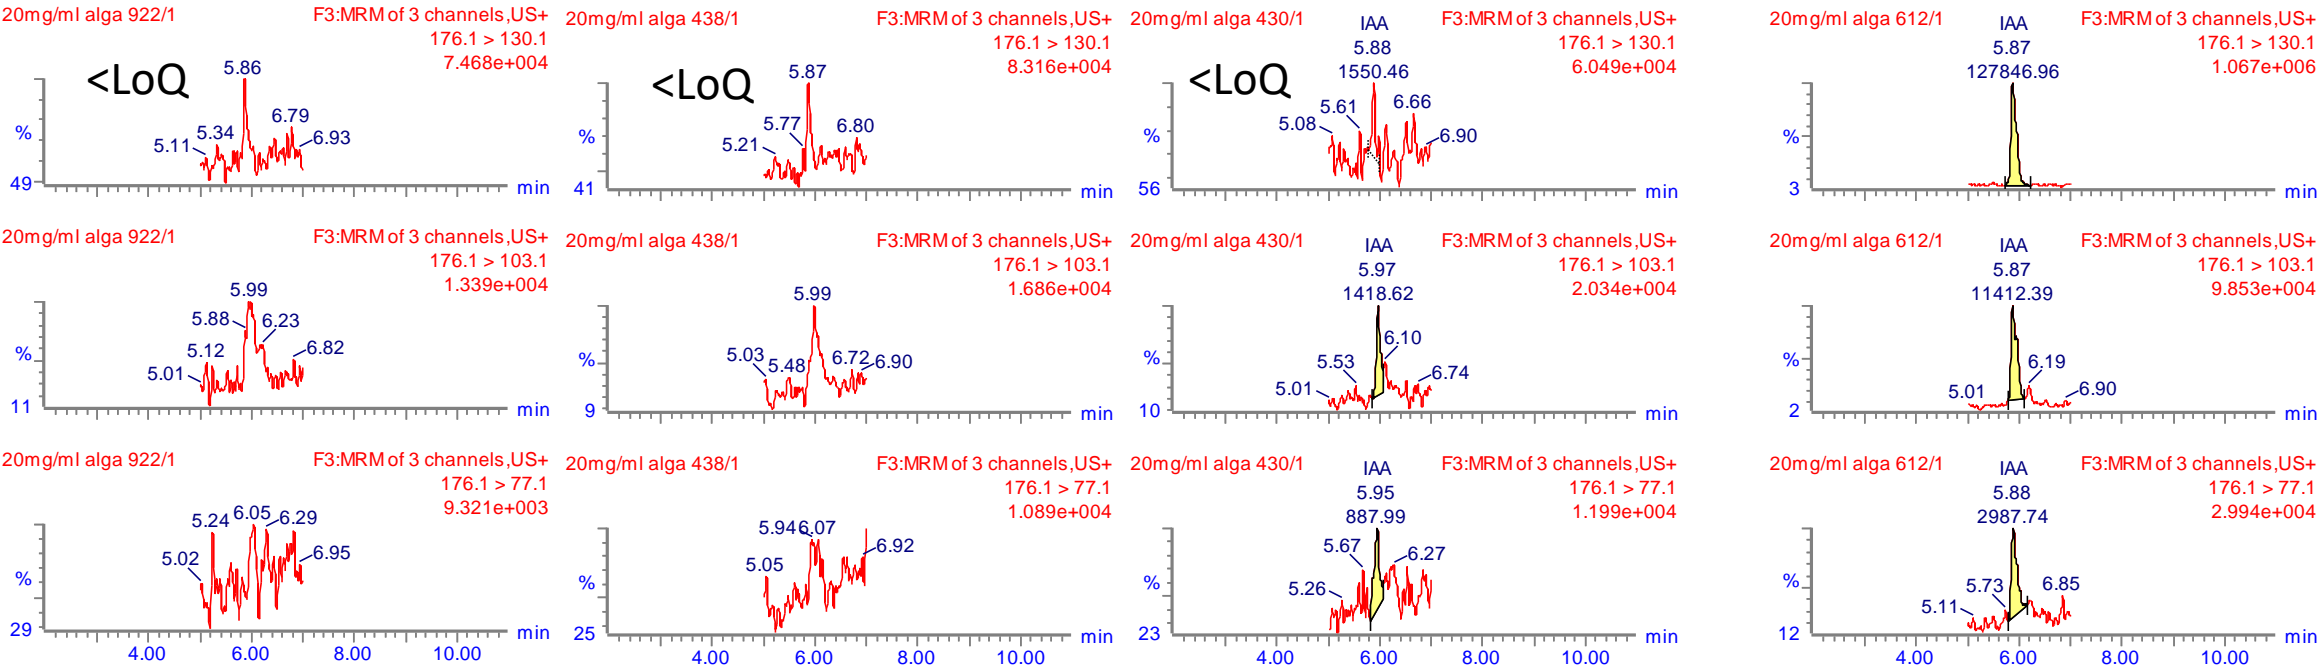

Indole-3-acetic acid (IAA) MRM type MS/MS  
chromatograms, slide 2 of 2  
quantitative transition: US + 176.1>130.1

SAMPLES (20mg/ml):

ALGAE 430/1

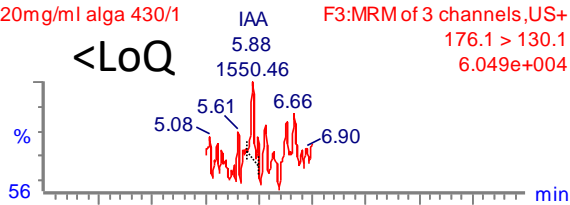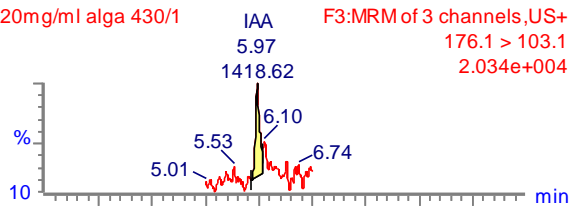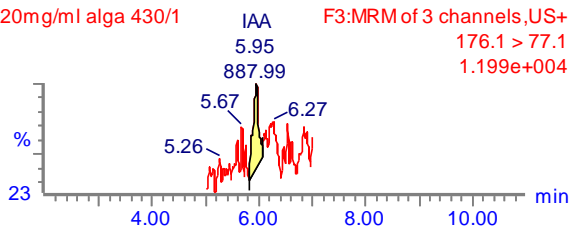

ALGAE 612/1

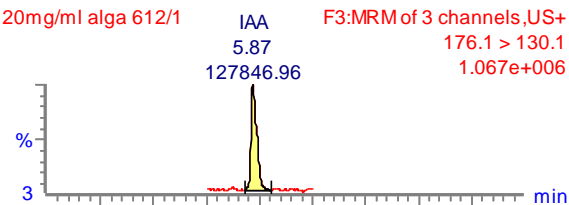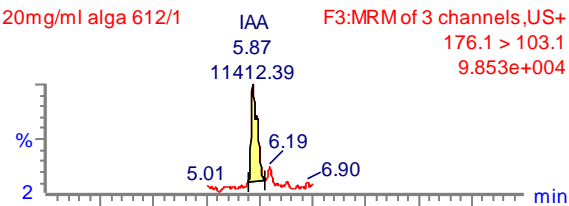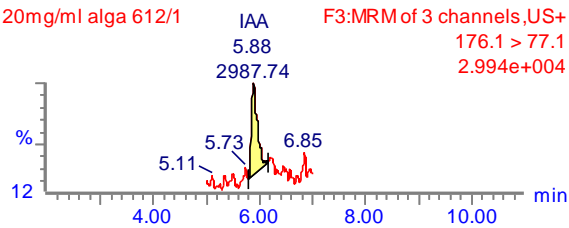

ALGAE 430/4S

spiked prior to extraction  
at 25ng/ml

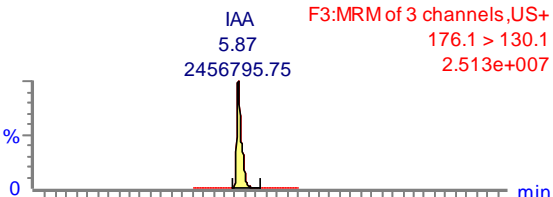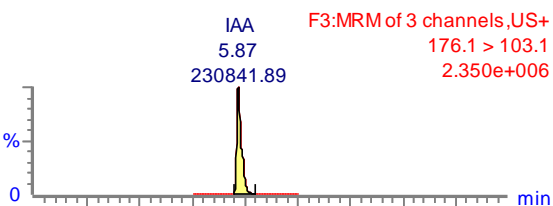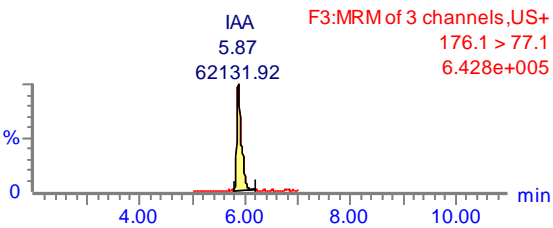

Procedural Solvent

calibration point

prepared as samples at  
25ng/ml final conc.

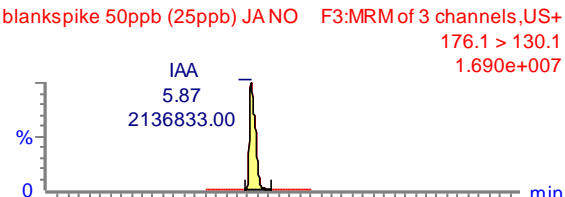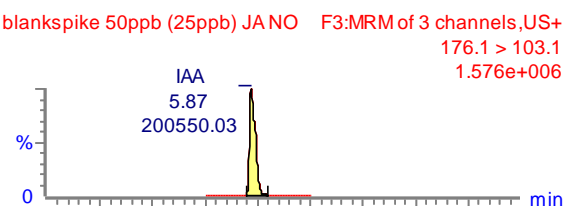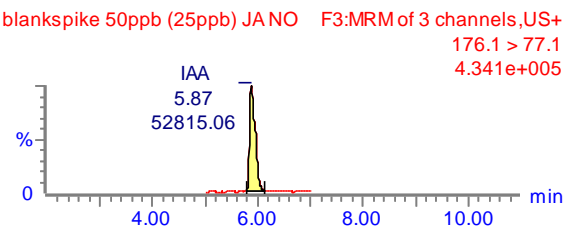

# *para*-Hydroxibenzoic acid

Four sample chromatograms, a spiked sample chromatogram and an external solvent calibration points of *para*-hydroxibenzoic acid.

Para-hydroxybenzoic acid MRM type MS/MS chromatograms,  
quantitative transition: US - 137>93

Procedural Solvent  
calibration point

prepared as samples at  
25ng/ml final conc.

ALGAE 430/4S  
spiked prior to extraction  
at 25ng/ml

SAMPLES (20mg/ml):

ALGAE 922/1

ALGAE 438/1

ALGAE 430/1

ALGAE 612/1

20mg/ml alga 922/1F10:MRM of 2 channels,US-  
137 > 93.01  
1.147e+006

20mg/ml alga 438/1F10:MRM of 2 channels,US-  
137 > 93.01  
8.400e+005

20mg/ml alga 430/1F10:MRM of 2 channels,US-  
137 > 93.01  
8.429e+005

20mg/ml alga 612/1F10:MRM of 2 channels,US-  
137 > 93.01  
5.138e+006

F10:MRM of 2 channels,US-  
137 > 93.01  
8.960e+006

F10:MRM of 2 channels,US-  
137 > 93.01  
2.033e+007

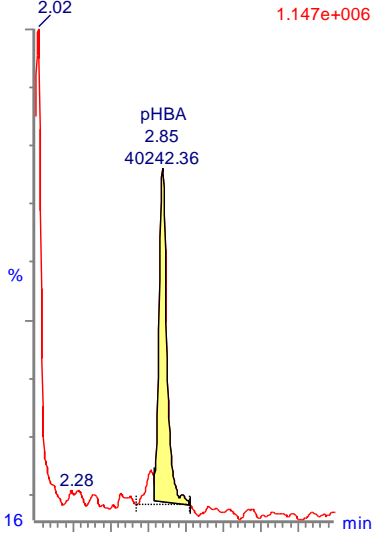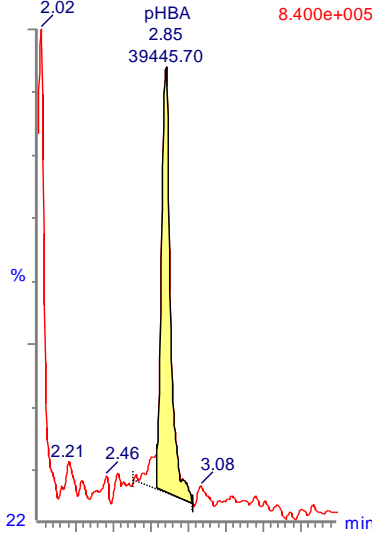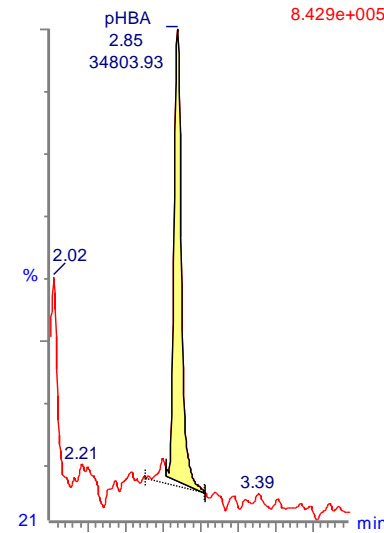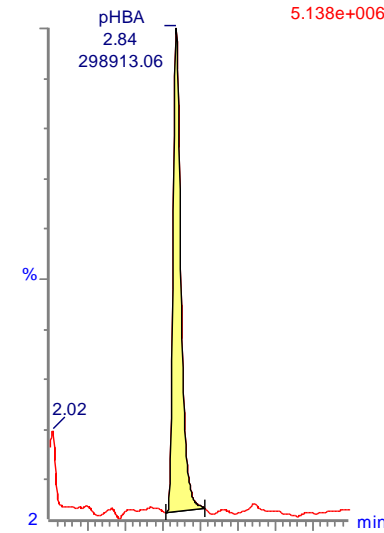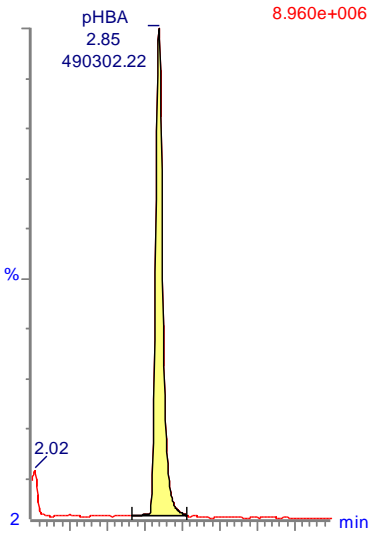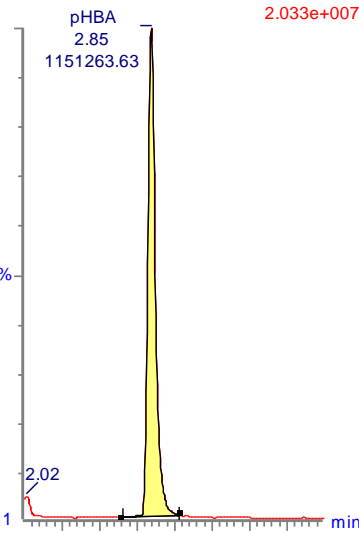

20mg/ml alga 922/1F10:MRM of 2 channels,US-  
137 > 64.91  
8.869e+003

20mg/ml alga 438/1F10:MRM of 2 channels,US-  
137 > 64.91  
9.582e+003

20mg/ml alga 430/1F10:MRM of 2 channels,US-  
137 > 64.91  
6.064e+003

20mg/ml alga 612/1F10:MRM of 2 channels,US-  
137 > 64.91  
5.166e+004

F10:MRM of 2 channels,US-  
137 > 64.91  
9.597e+004

F10:MRM of 2 channels,US-  
137 > 64.91  
2.226e+005

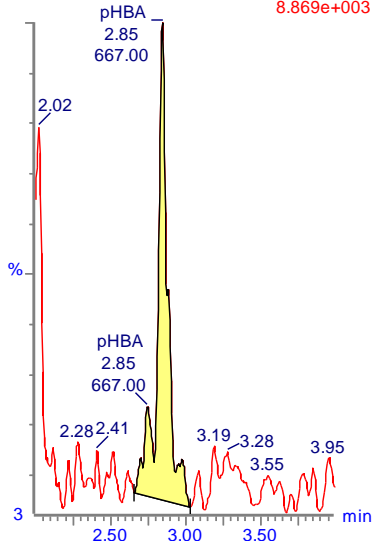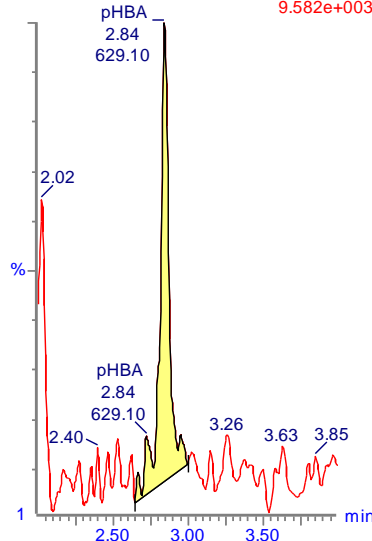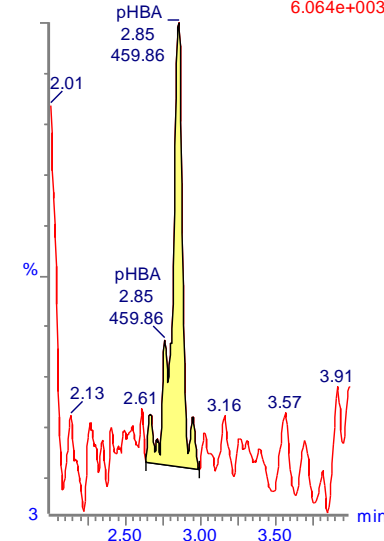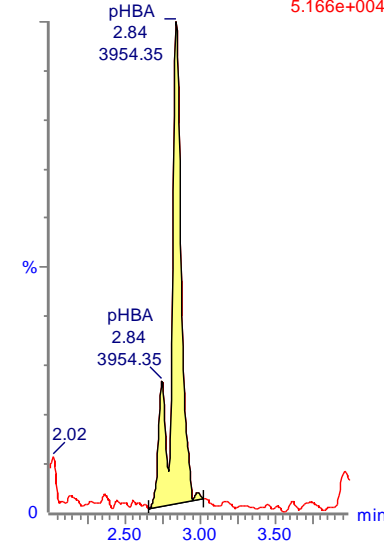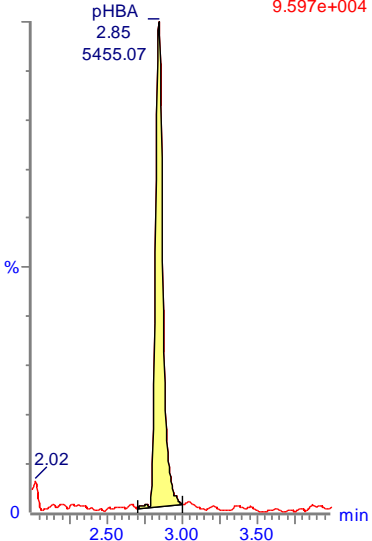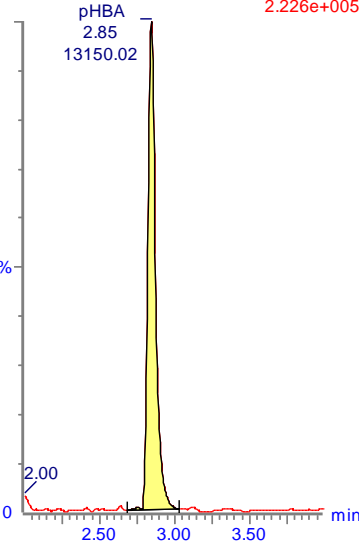

# Salycilic acid

Four sample chromatograms, a spiked sample chromatogram and an external solvent calibration points of salycilic acid.



SAMPLES (20mg/ml):

Salicylic acid MRM type MS/MS chromatograms,  
quantitative transition: US - 137>93

Procedural Solvent  
calibration point

ALGAE 922/1

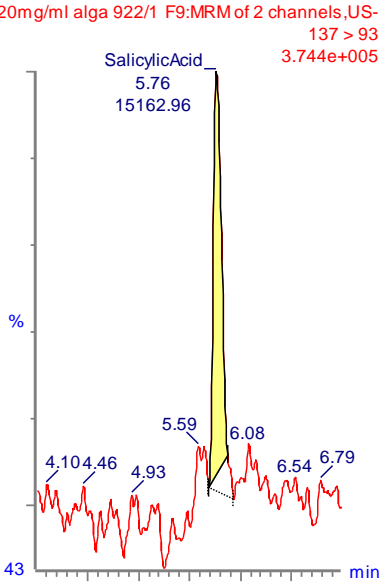

ALGAE 438/1

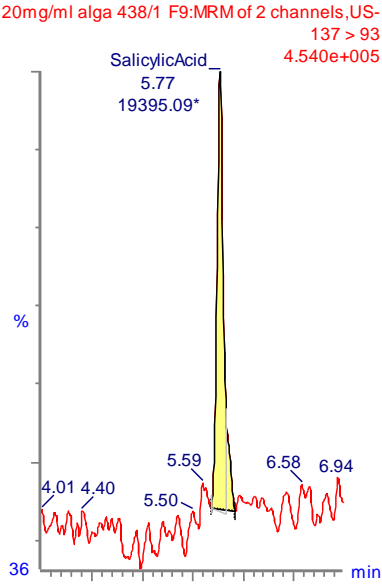

ALGAE 430/1

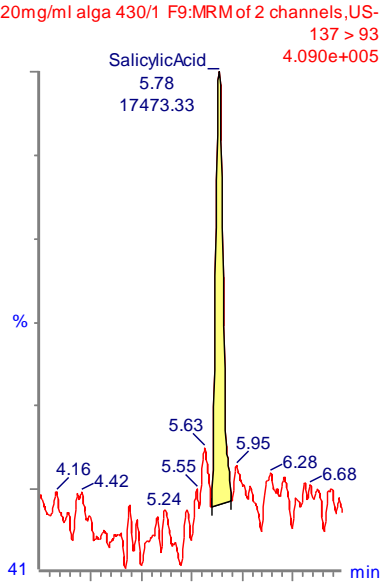

ALGAE 612/1

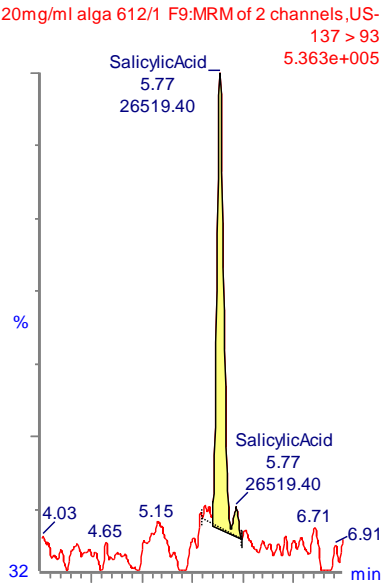

ALGAE 430/4S

spiked prior to extraction  
at 25ng/ml

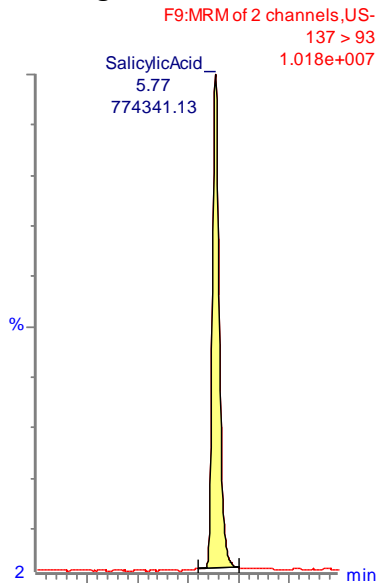

prepared as samples at  
25ng/ml final conc.

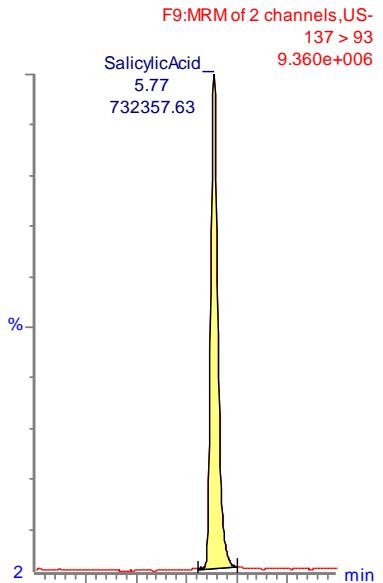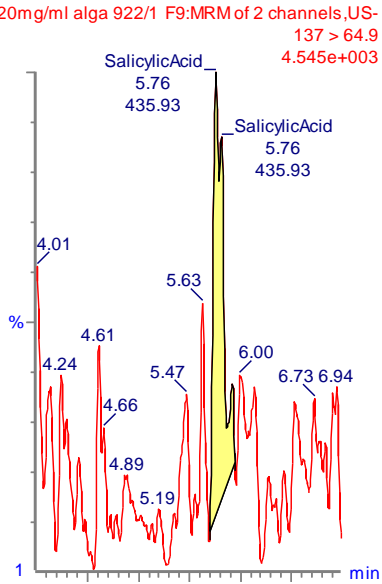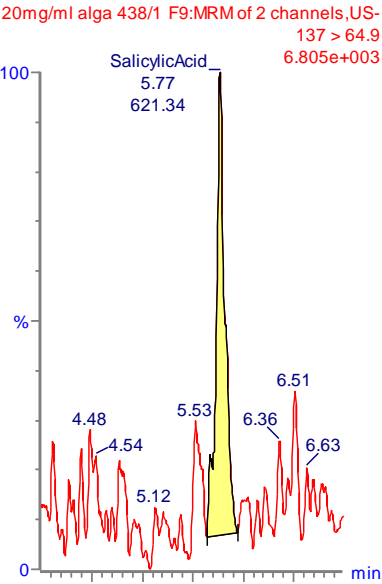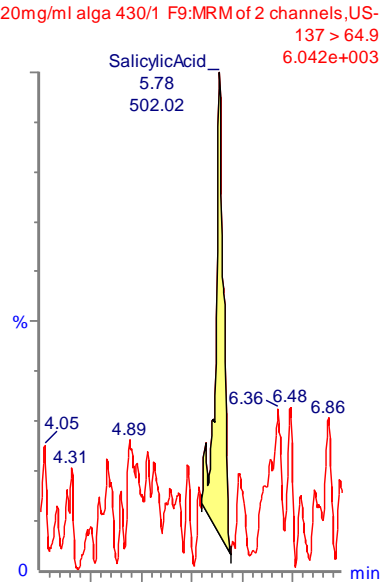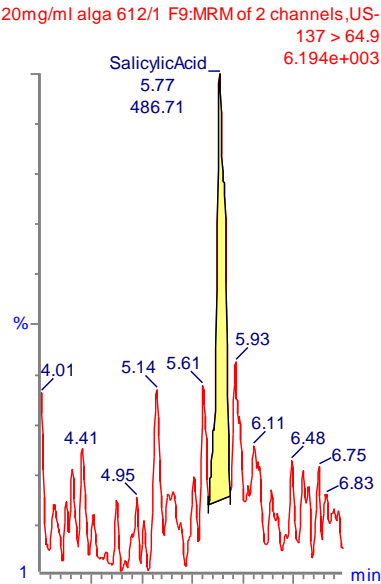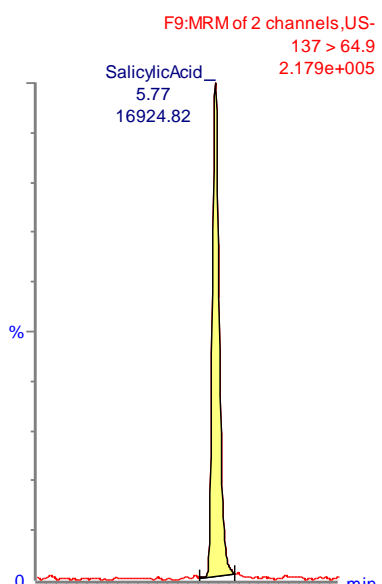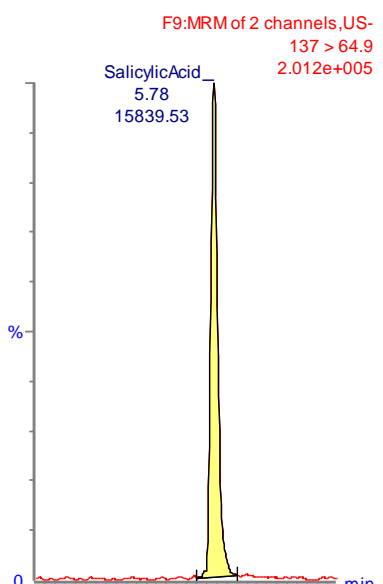

# Benzoic acid

Four sample chromatograms, a spiked sample chromatogram and an external solvent calibration points of benzoic acid.

Benzoic acid MRM type MS/MS chromatograms,  
quantitative transition: US - 121>77

Procedural Solvent  
calibration point

prepared as samples at  
25ng/ml final conc.

SAMPLES (20mg/ml):

ALGAE 922/1

ALGAE 438/1

ALGAE 430/1

ALGAE 612/1

ALGAE 430/4S

spiked prior to extraction  
at 25ng/ml

20mg/ml alga 922/3 F8:MRM of 1 channel,US-  
121 > 77 3.374e+004

20mg/ml alga 438/2 F8:MRM of 1 channel,US-  
121 > 77 2.447e+004

20mg/ml alga 430/1 F8:MRM of 1 channel,US-  
121 > 77 2.685e+004

20mg/ml alga 612/1 F8:MRM of 1 channel,US-  
121 > 77 4.893e+004

F8:MRM of 1 channel,US-  
121 > 77 3.718e+005

F8:MRM of 1 channel,US-  
121 > 77 6.645e+005

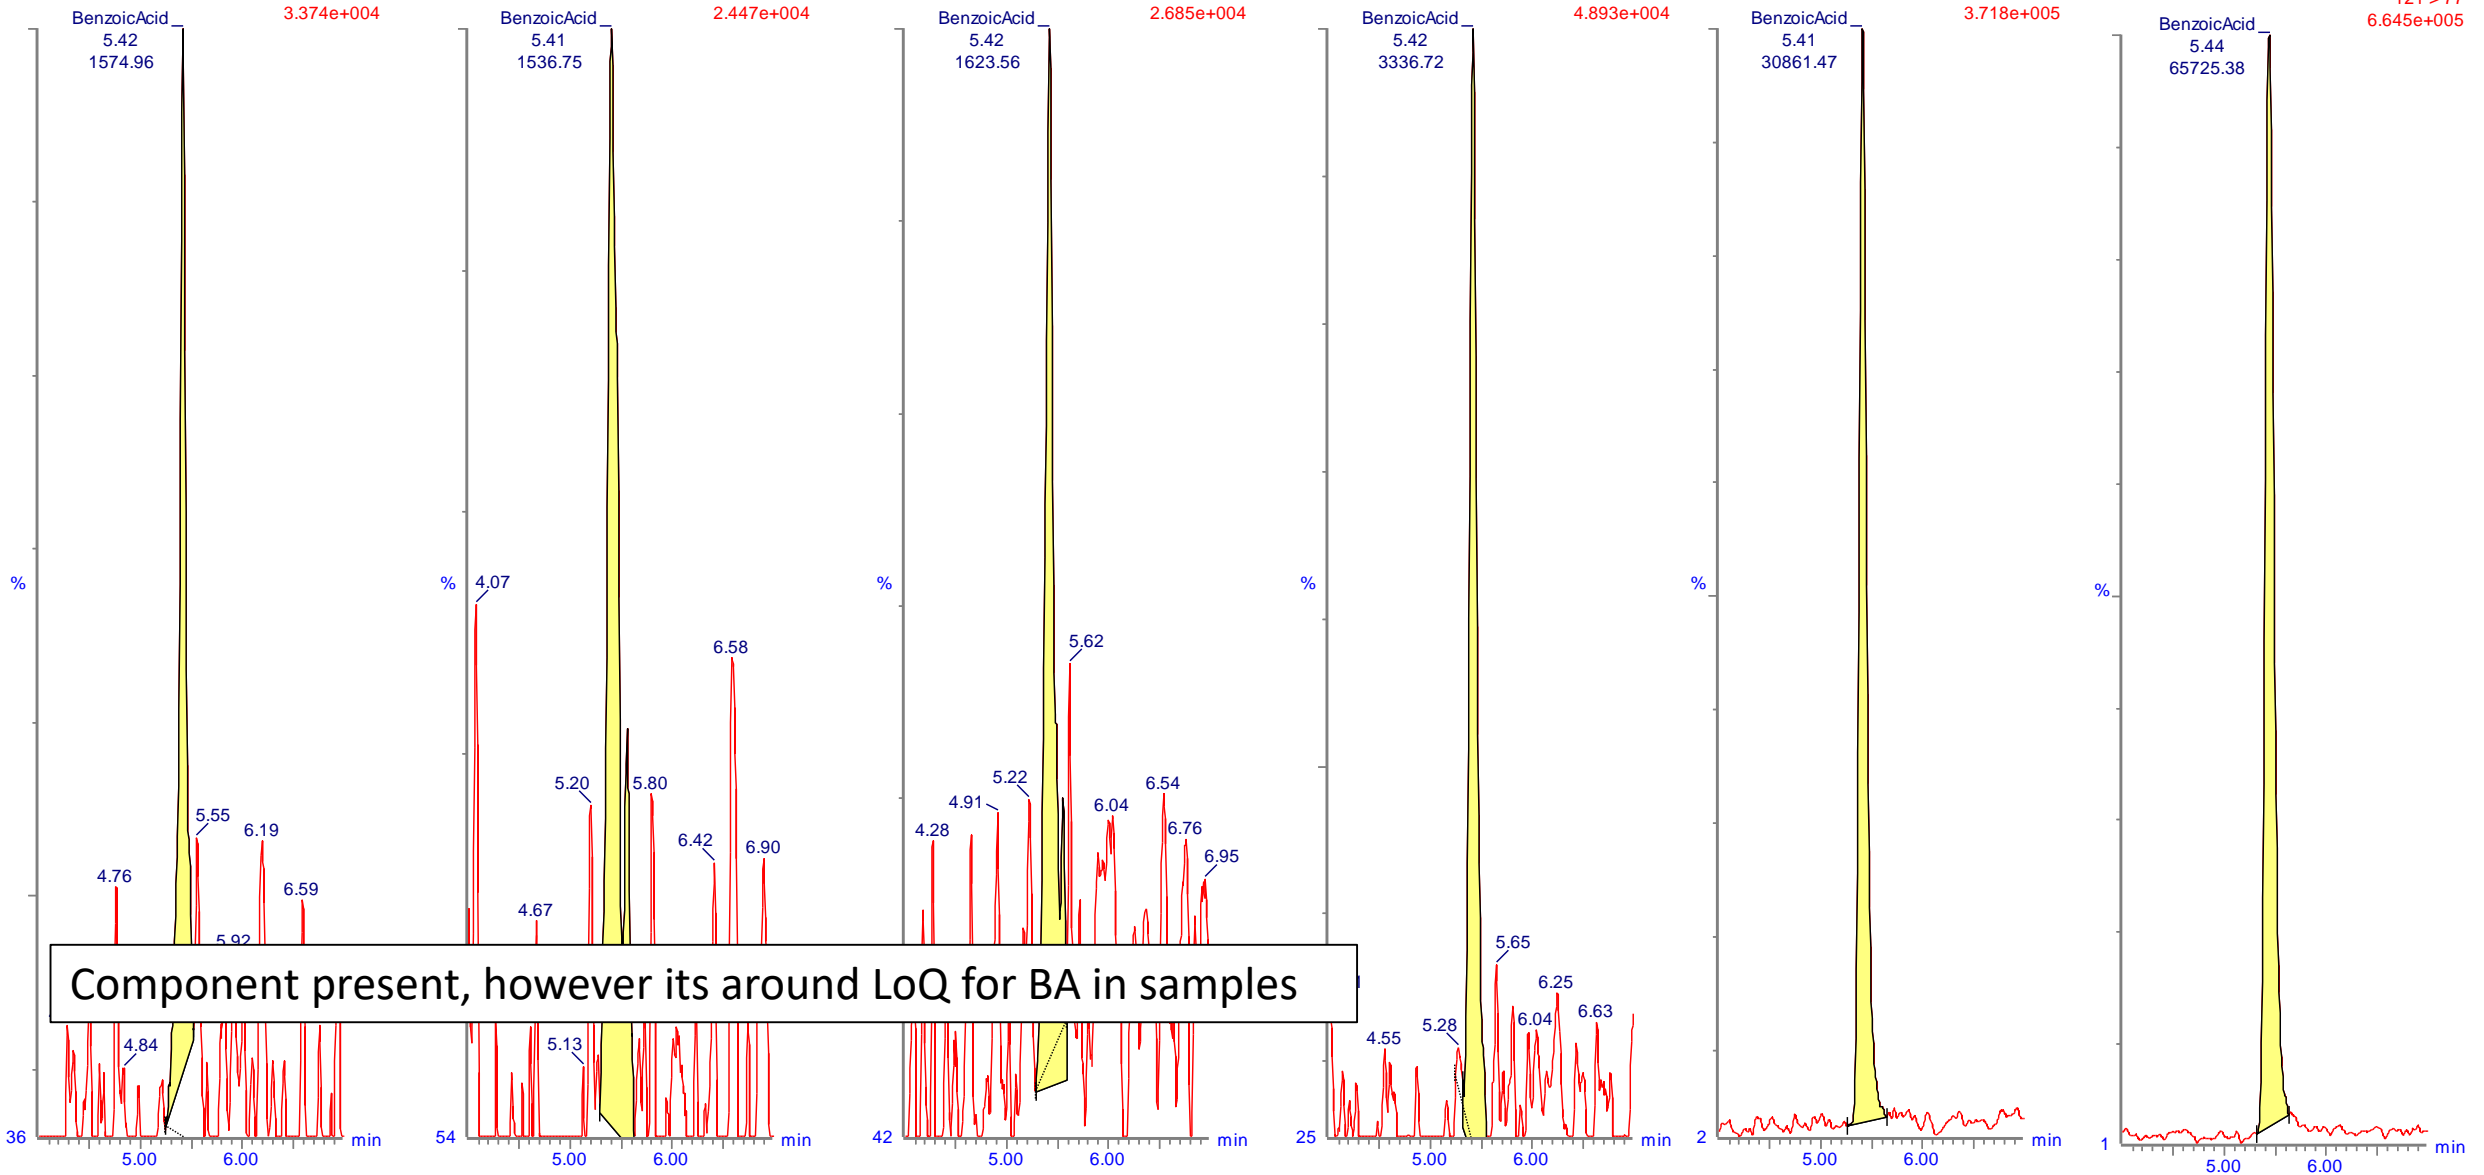

Component present, however its around LoQ for BA in samples

# Gibberellic acid (GA3)

Page 21: A sample chromatogram below LoQ, a spiked chromatogram of the same sample and two lower external solvent calibration points of GA3.

Page 22: Four sample chromatograms of GA3.

Example for a lower abundant plant hormone compound, that was <LoQ for all samples slide 1 of 2

**Gibberellic acid (GA3) MRM type MS/MS chromatograms, quantitative transition: US – 345>239**

ALGAE 430/1

<LoQ

ALGAE 430/4S

spiked prior to extraction  
at 25ng/ml

Procedural solvent  
calibration point  
prepared as samples at  
25ng/ml final conc.

Lower external solvent calibration points  
at 0.5 ng/ml and 0.1 ng/ml

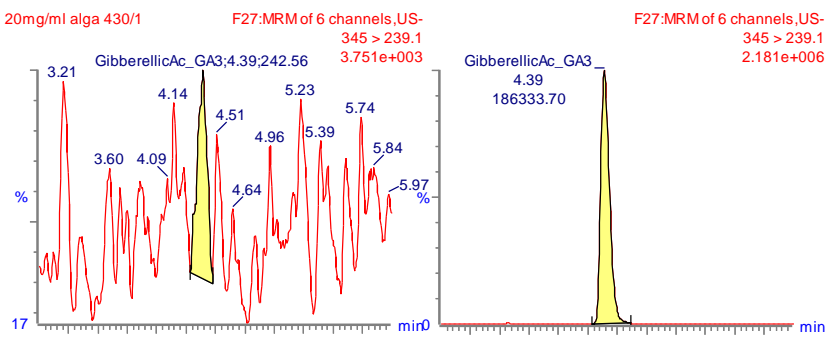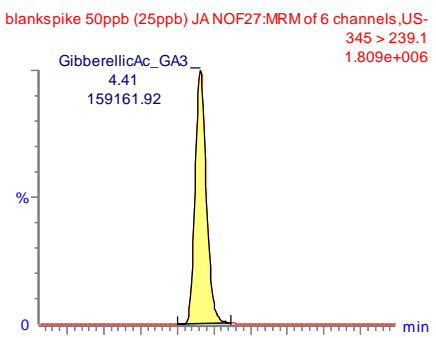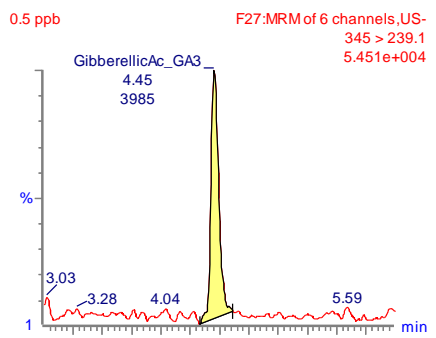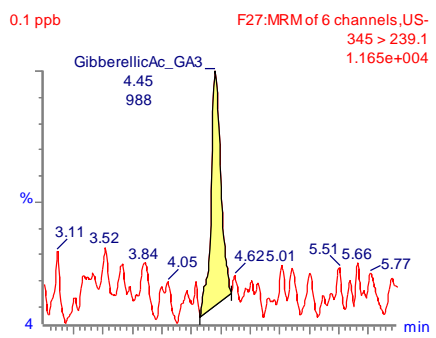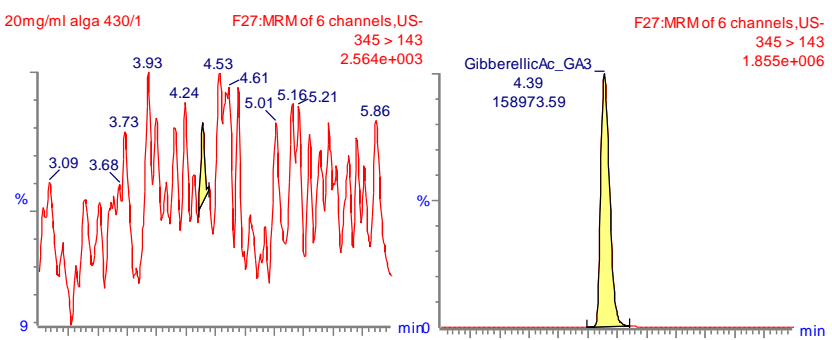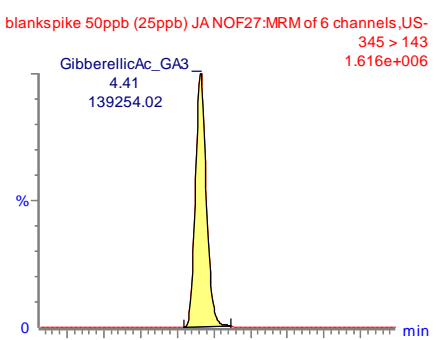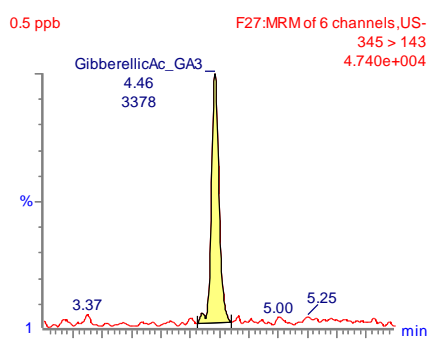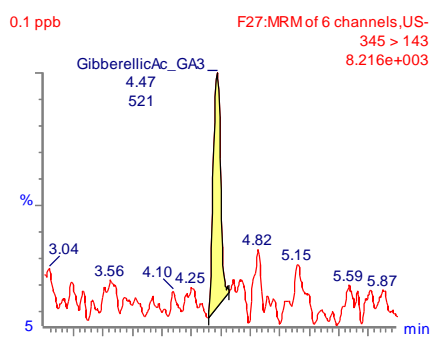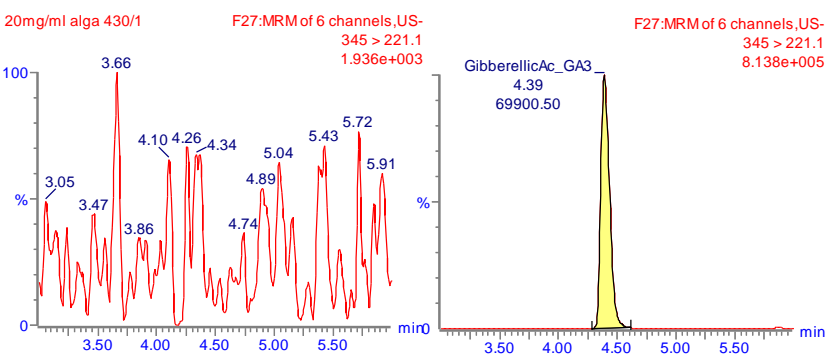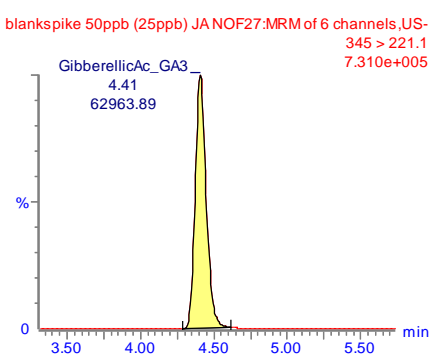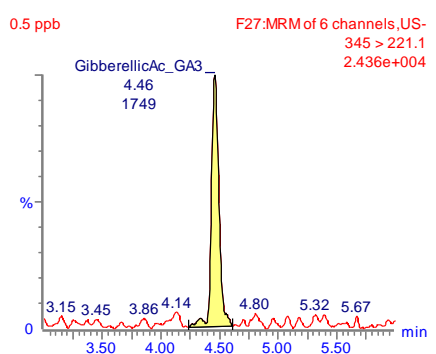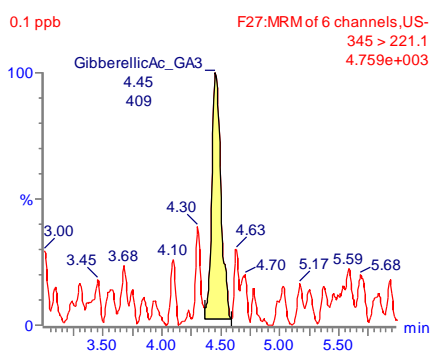

Example for a lower abundant plant hormone compound, that was <LoQ for all samples slide 2 of 2  
Gibberellic acid (GA3) MRM type MS/MS chromatograms,  
quantitative transition: US – 345>239

SAMPLES (20mg/ml): ALGAE 922/1  
<LoQ

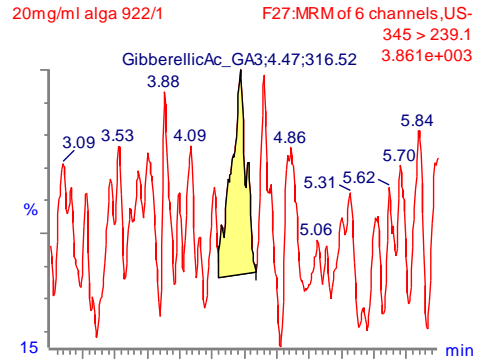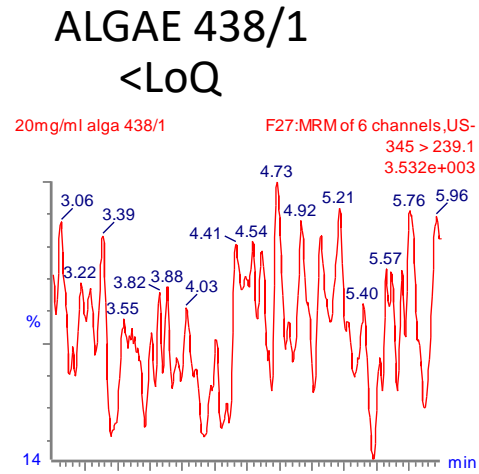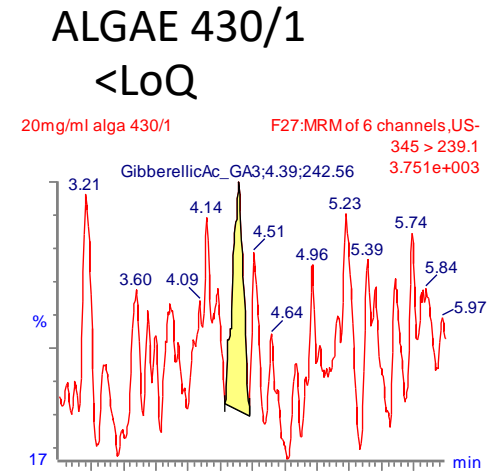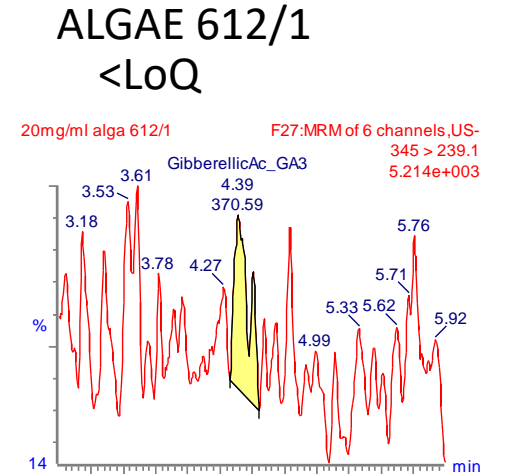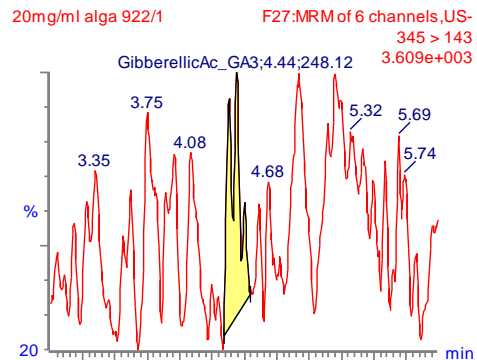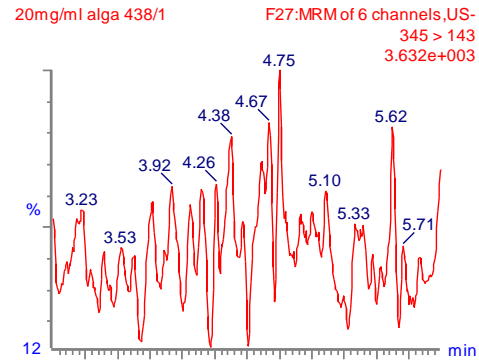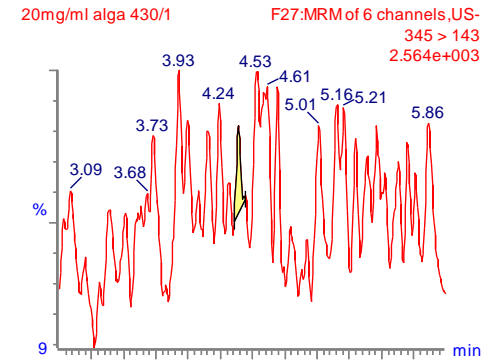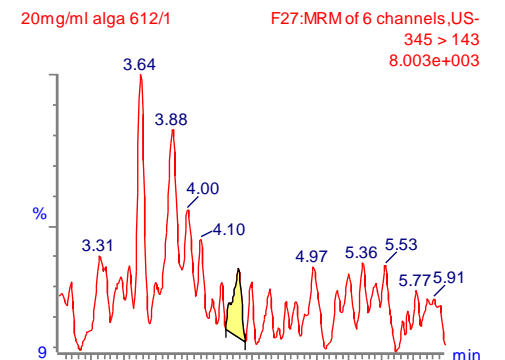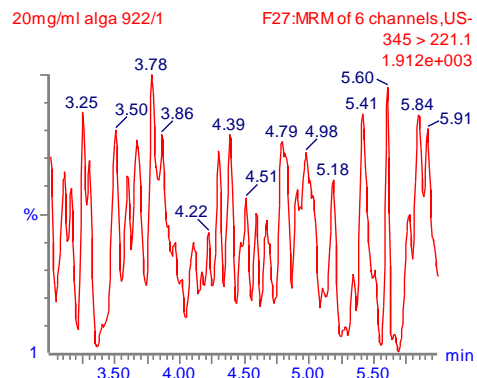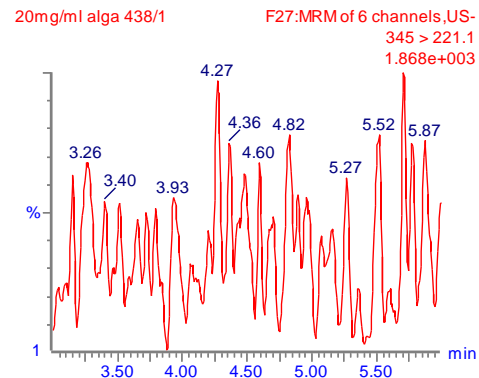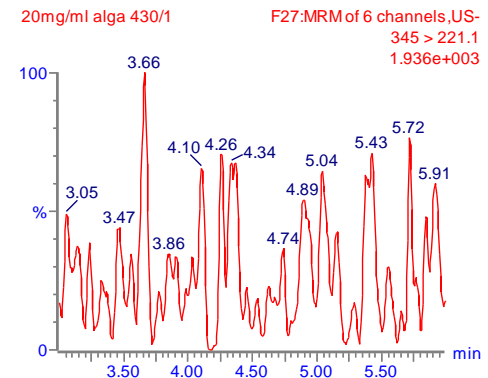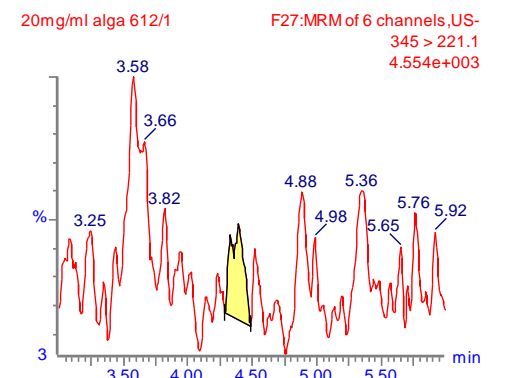

Supplement: s1 [file s1]
